# Supplementary material for: Single-cell RNA sequencing analysis of human bone-marrow-derived mesenchymal stem cells and functional subpopulation identification
Source: PubMed Central journal article supplement (PMC9076886; doi:10.1038/s12276-022-00749-5), 2022-04-01

### **Supplementary Fig. 1 Cell quality for single-cell sequencing**

The UMI and gene counts of the detected cells shown on the t-SNE map.

### **Supplementary Fig. 2 Cell markers of MSCs in scRNA sequencing and flow cytometry**

MSCs were positive for CD29, CD44, and CD105 and negative for CD14, CD34, and CD45.

### **Supplementary Fig. 3 GO and KEGG analyses of the stemness subpopulation**

The biological process, molecular function and cellular component terms identified by GO analysis and the top ten enriched pathways identified by KEGG analysis of the stemness subpopulation.

### **Supplementary Fig. 4 GO and KEGG analyses of the functional subpopulation**

The biological process, molecular function and cellular component terms identified by GO analysis and the top ten enriched pathways identified by KEGG analysis of the functional subpopulation.

### **Supplementary Fig. 5 GO and KEGG analyses of proliferative subpopulation 1**

The biological process, molecular function and cellular component terms identified by GO analysis and the top ten enriched pathways identified by KEGG analysis of proliferative subpopulation 1.

### **Supplementary Fig. 6 GO and KEGG analyses of proliferative subpopulation 2**

The biological process, molecular function and cellular component terms identified by GO analysis and the top ten enriched pathways identified by KEGG analysis of proliferative subpopulation 2.

**Supplementary Table 1 Primers for qRT-PCR**

| <b>Gene</b>   | <b>Forward primer<br/>(5'-3')</b> | <b>Reverse primer<br/>(5'-3')</b> |
|---------------|-----------------------------------|-----------------------------------|
| <i>GAPDH</i>  | GGAGCGAGATCCCTCCAAAAT             | GGCTGTTGTCATACTTCTCATGG           |
| <i>CCL2</i>   | CAGCCAGATGCAATCAATGCC             | TGGAATCCTGAACCCACTTCT             |
| <i>TGF-β</i>  | GTAGCTCTGATGAGTGCAATGAC           | CAGATATGGCAACTCCCAGTG             |
| <i>IGFBP2</i> | GACAATGGCGATGACCACTCA             | CAGCTCCTTCATACCCGACTT             |
| <i>PTX3</i>   | TTATTCCCAATGCGTTCCAAGA            | GCACTAAAAGACTCAAGCCTCAT           |
| <i>GREM1</i>  | CGGAGCGCAAATACCTGAAG              | GGTTGATGATGGTGCGACTGT             |
| <i>CTGF</i>   | CAGCATGGACGTTTCGTCTG              | AACCACGGTTTGGTCCTTGG              |

## Supplementary table 2

| Gene symbol | Log2 Fold Change |
|-------------|------------------|
| FEN1        | 2.935536         |
| MRE11       | 1.418175         |
| MCM7        | 2.373598         |
| MCM8        | 2.26455          |
| MCM10       | 4.138915         |
| BRCA1       | 2.86558          |
| CHAF1A      | 3.112554         |
| EXO1        | 4.015916         |
| CHEK1       | 1.467726         |
| TOPBP1      | 1.764003         |
| TIPIN       | 2.139575         |
| SUPT16H     | 1.039385         |
| RFC3        | 2.776971         |
| RFC4        | 2.765397         |
| LIG1        | 2.027143         |
| RFC1        | 1.275678         |
| RMI1        | 2.385752         |
| RFC2        | 2.011753         |
| DBF4        | 1.4762           |
| MCM3        | 2.838499         |
| TIMELESS    | 1.86632          |
| MCM4        | 2.666432         |
| MCM5        | 2.560618         |
| MCM6        | 2.3425           |
| DTL         | 3.956429         |
| MCM2        | 2.955375         |
| RHNO1       | 0.929518         |
| PCNA        | 2.220505         |
| POLD3       | 2.493612         |
| BRIP1       | 3.413335         |
| ORC6        | 2.6485           |
| RBBP8       | 1.852159         |
| CLSPN       | 3.150775         |
| BARD1       | 2.44016          |
| GIN52       | 2.565464         |
| CDT1        | 3.14733          |
| DUT         | 1.029468         |
| RRM1        | 1.594176         |
| RRM2        | 1.930456         |
| RPA1        | 1.297289         |
| RPA2        | 1.602528         |
| SSRP1       | 0.983949         |
| CDC6        | 3.905793         |
| FAM111A     | 1.682143         |
| POLA1       | 2.226103         |
| POLA2       | 2.198951         |
| NASP        | 1.828586         |
| RPA3        | 0.932672         |
| POLE3       | 1.1466           |
| CDK1        | 1.667457         |
| RAD1        | 1.063463         |
| ERCC6L      | 2.239518         |
| USP37       | 1.74614          |
| ZWILCH      | 1.172221         |
| CDCA7L      | 2.139075         |
| CCNF        | 1.047201         |

|          |          |
|----------|----------|
| NCAPG2   | 1.460765 |
| BUB1B    | 1.184632 |
| KIF11    | 1.435932 |
| SMC3     | 1.301353 |
| SMC4     | 1.204918 |
| SMC2     | 0.987434 |
| CCND3    | 1.010907 |
| MIS18BP1 | 1.129577 |
| NUF2     | 1.122924 |
| KNTC1    | 1.971914 |
| FBXO5    | 2.841987 |
| SPDL1    | 1.391126 |
| HELLS    | 2.872735 |
| HAUS6    | 1.524402 |
| VRK1     | 1.900651 |
| KNL1     | 1.076291 |
| SMC1A    | 1.282667 |
| MASTL    | 2.668911 |
| CCSAP    | 1.007808 |
| HAUS1    | 1.114009 |
| SGO1     | 1.561014 |
| CCNA2    | 1.30648  |
| SGO2     | 0.953301 |
| CCNE2    | 4.251422 |
| KIFC1    | 1.926731 |
| BIRC5    | 1.052779 |
| KIF2C    | 0.960964 |
| KIF20B   | 1.073865 |
| ITGB3BP  | 1.374313 |
| CDCA2    | 1.417041 |
| CDCA4    | 2.283238 |
| CDCA5    | 2.597367 |
| NCAPG    | 1.969285 |
| CDCA8    | 1.084822 |
| SKA3     | 2.062131 |
| NCAPH    | 1.796582 |
| SKA1     | 1.82844  |
| DSN1     | 2.303132 |
| MCMBP    | 1.450455 |
| SAC3D1   | 1.304699 |
| CENPX    | 1.02232  |
| RCC2     | 0.958686 |
| NDC80    | 1.234302 |
| ZWINT    | 1.728831 |
| NEDD1    | 1.316264 |
| WEE1     | 1.500421 |
| MIS18A   | 1.652199 |
| CENPJ    | 1.883941 |
| TACC3    | 1.328703 |
| NCAPD3   | 1.65624  |
| SPC25    | 1.302168 |
| MAD2L1   | 1.55497  |
| YEATS4   | 1.836655 |
| KIF15    | 1.884215 |
| NUP62    | 1.446928 |
| PBK      | 1.129277 |
| INCENP   | 1.031166 |
| NOLC1    | 1.003147 |

|          |          |
|----------|----------|
| AURKB    | 1.808422 |
| ANLN     | 0.960726 |
| CENPN    | 1.258183 |
| NUP107   | 1.169232 |
| CENPU    | 2.7449   |
| DDX11    | 2.54839  |
| CENPH    | 1.42806  |
| CENPK    | 1.868297 |
| CENPL    | 1.359069 |
| CENPM    | 1.640908 |
| PRIM2    | 1.878187 |
| PRIM1    | 3.155858 |
| TYMS     | 1.635421 |
| PPAT     | 1.271959 |
| EIF4EBP1 | 0.989518 |
| RANBP1   | 0.975873 |
| CDKN2C   | 1.09295  |
| DHFR     | 1.591592 |

## Supplementary table 3

| Gene symt | Log2 Fold Change |
|-----------|------------------|
| ERCC6L    | 2.620536         |
| ZWILCH    | 1.569499         |
| CCNF      | 3.455371         |
| NCAPG2    | 2.044759         |
| KIF14     | 3.768227         |
| BUB1B     | 3.368858         |
| KIF11     | 3.143151         |
| SMC4      | 2.496832         |
| CKS1B     | 2.261582         |
| SMC2      | 1.472151         |
| CDC20     | 3.584997         |
| TUBA1C    | 1.676992         |
| PTTG1     | 1.995958         |
| MIS18BP1  | 2.118241         |
| CNTRL     | 2.253416         |
| NUF2      | 3.509828         |
| KNTC1     | 1.742633         |
| NEK2      | 3.919552         |
| FBXO5     | 1.563483         |
| KMT5A     | 1.215264         |
| SPDL1     | 2.269053         |
| HELLS     | 1.043674         |
| LIG1      | 1.539678         |
| TUBB      | 1.184184         |
| HAUS6     | 1.074748         |
| VRK1      | 1.563427         |
| KNL1      | 3.199171         |
| SMC1A     | 1.219385         |
| MASTL     | 1.172901         |
| CCSAP     | 1.682839         |
| KNSTRN    | 2.391554         |
| CKAP5     | 1.890578         |
| CDC25B    | 2.257686         |
| SGO1      | 3.167241         |
| CCNA2     | 3.366578         |
| SGO2      | 3.238056         |
| KIFC1     | 2.90998          |
| CKS2      | 2.928416         |
| TIMELESS  | 1.491325         |
| BIRC5     | 2.416937         |
| MCM5      | 1.144287         |
| KIF2C     | 3.622585         |
| KIF20B    | 3.075404         |
| ITGB3BP   | 1.444958         |
| CDCA2     | 3.256567         |
| CDCA3     | 3.11203          |
| CDCA4     | 1.243772         |
| CDCA5     | 2.049053         |
| NCAPG     | 2.73524          |
| CDCA8     | 3.795958         |
| SKA3      | 2.311082         |
| NCAPH     | 2.51443          |
| SKA1      | 2.816421         |
| AURKA     | 3.826738         |
| CCNB2     | 3.015049         |
| CCNB1     | 3.321124         |

|         |          |
|---------|----------|
| RAD21   | 1.697236 |
| BUB3    | 1.808302 |
| FAM83D  | 4.224186 |
| BUB1    | 3.15687  |
| SAC3D1  | 1.341114 |
| CENPW   | 1.798517 |
| SPAG5   | 3.036071 |
| UBE2C   | 3.753382 |
| NDE1    | 1.81369  |
| NDC80   | 3.304675 |
| ZWINT   | 2.183089 |
| MAD2L2  | 1.185439 |
| CENPE   | 3.63912  |
| TPX2    | 3.204753 |
| NEDD1   | 1.237917 |
| CENPF   | 3.427143 |
| WEE1    | 1.90561  |
| MIS18A  | 1.913845 |
| UBE2S   | 2.288222 |
| REEP4   | 2.065033 |
| CENPJ   | 1.695594 |
| CDK1    | 3.185669 |
| TACC3   | 2.99506  |
| NCAPD2  | 2.352147 |
| NCAPD3  | 1.438254 |
| SPC25   | 2.979352 |
| MAD2L1  | 2.386446 |
| KIF15   | 2.89503  |
| PBK     | 2.854683 |
| CEP55   | 3.132055 |
| KIF22   | 1.613923 |
| CIT     | 2.519706 |
| ASPM    | 3.82323  |
| INCENP  | 3.042269 |
| AURKB   | 3.053953 |
| PLK1    | 3.961599 |
| ANLN    | 2.873169 |
| CENPN   | 1.555091 |
| MRE11   | 1.091346 |
| NUP107  | 1.320773 |
| CENPA   | 4.174137 |
| CENPU   | 1.51098  |
| DDX11   | 1.12577  |
| RANGAP1 | 1.515178 |
| KIF18A  | 3.367401 |
| CENPH   | 1.674664 |
| CENPK   | 2.063573 |
| CENPL   | 1.930915 |
| CENPM   | 1.799102 |
| CCP110  | 1.037986 |
| HMMR    | 3.33203  |
| FOXM1   | 2.155673 |
| CEP192  | 1.225658 |
| PCNT    | 1.448829 |
| CEP78   | 1.352013 |
| CEP135  | 1.132995 |
| ODF2    | 1.391645 |
| CEP152  | 1.53284  |

|        |          |
|--------|----------|
| TUBB4B | 1.827119 |
| TUBG1  | 1.029274 |
| MELK   | 2.385446 |
| TOP2A  | 3.586443 |
| HJURP  | 3.483196 |
| BRCA1  | 1.112929 |
| ESCO2  | 1.808569 |



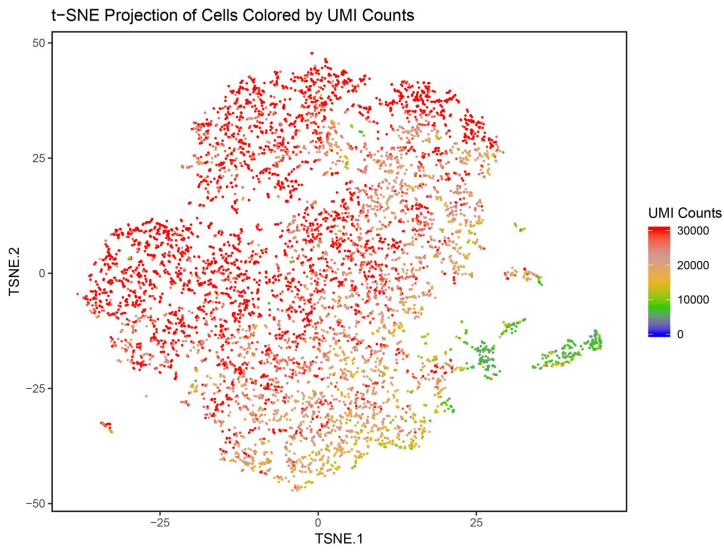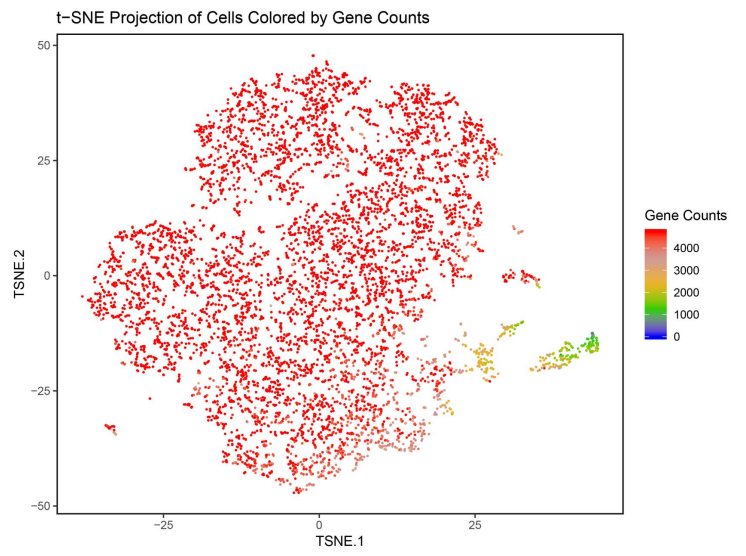

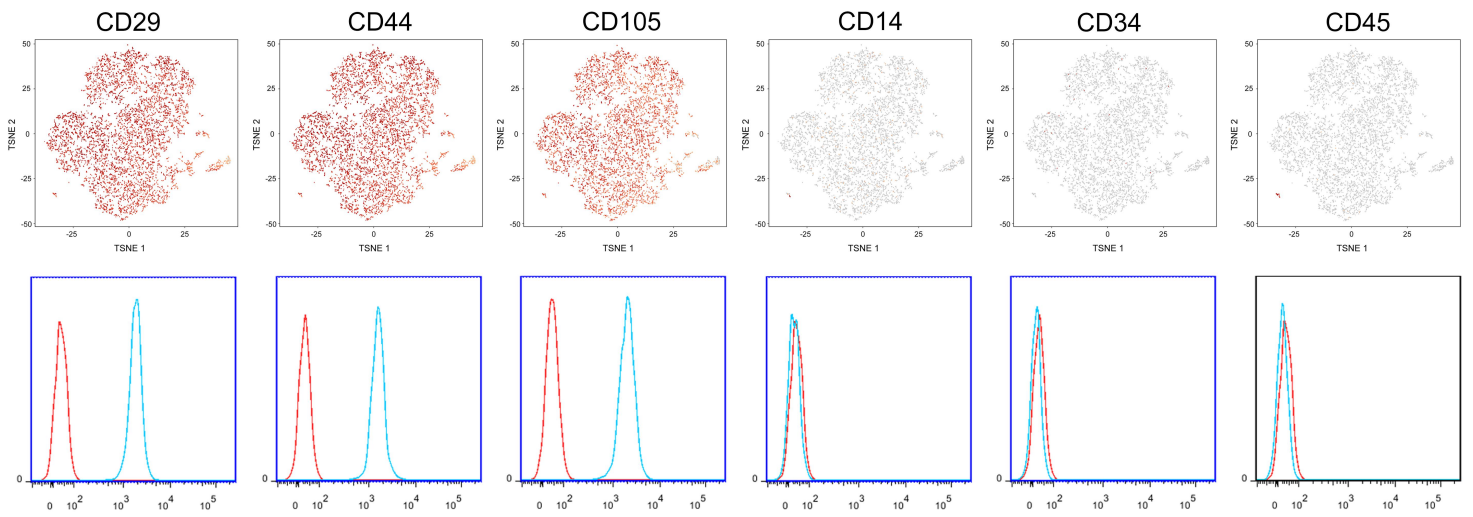

# Stemness Cluster

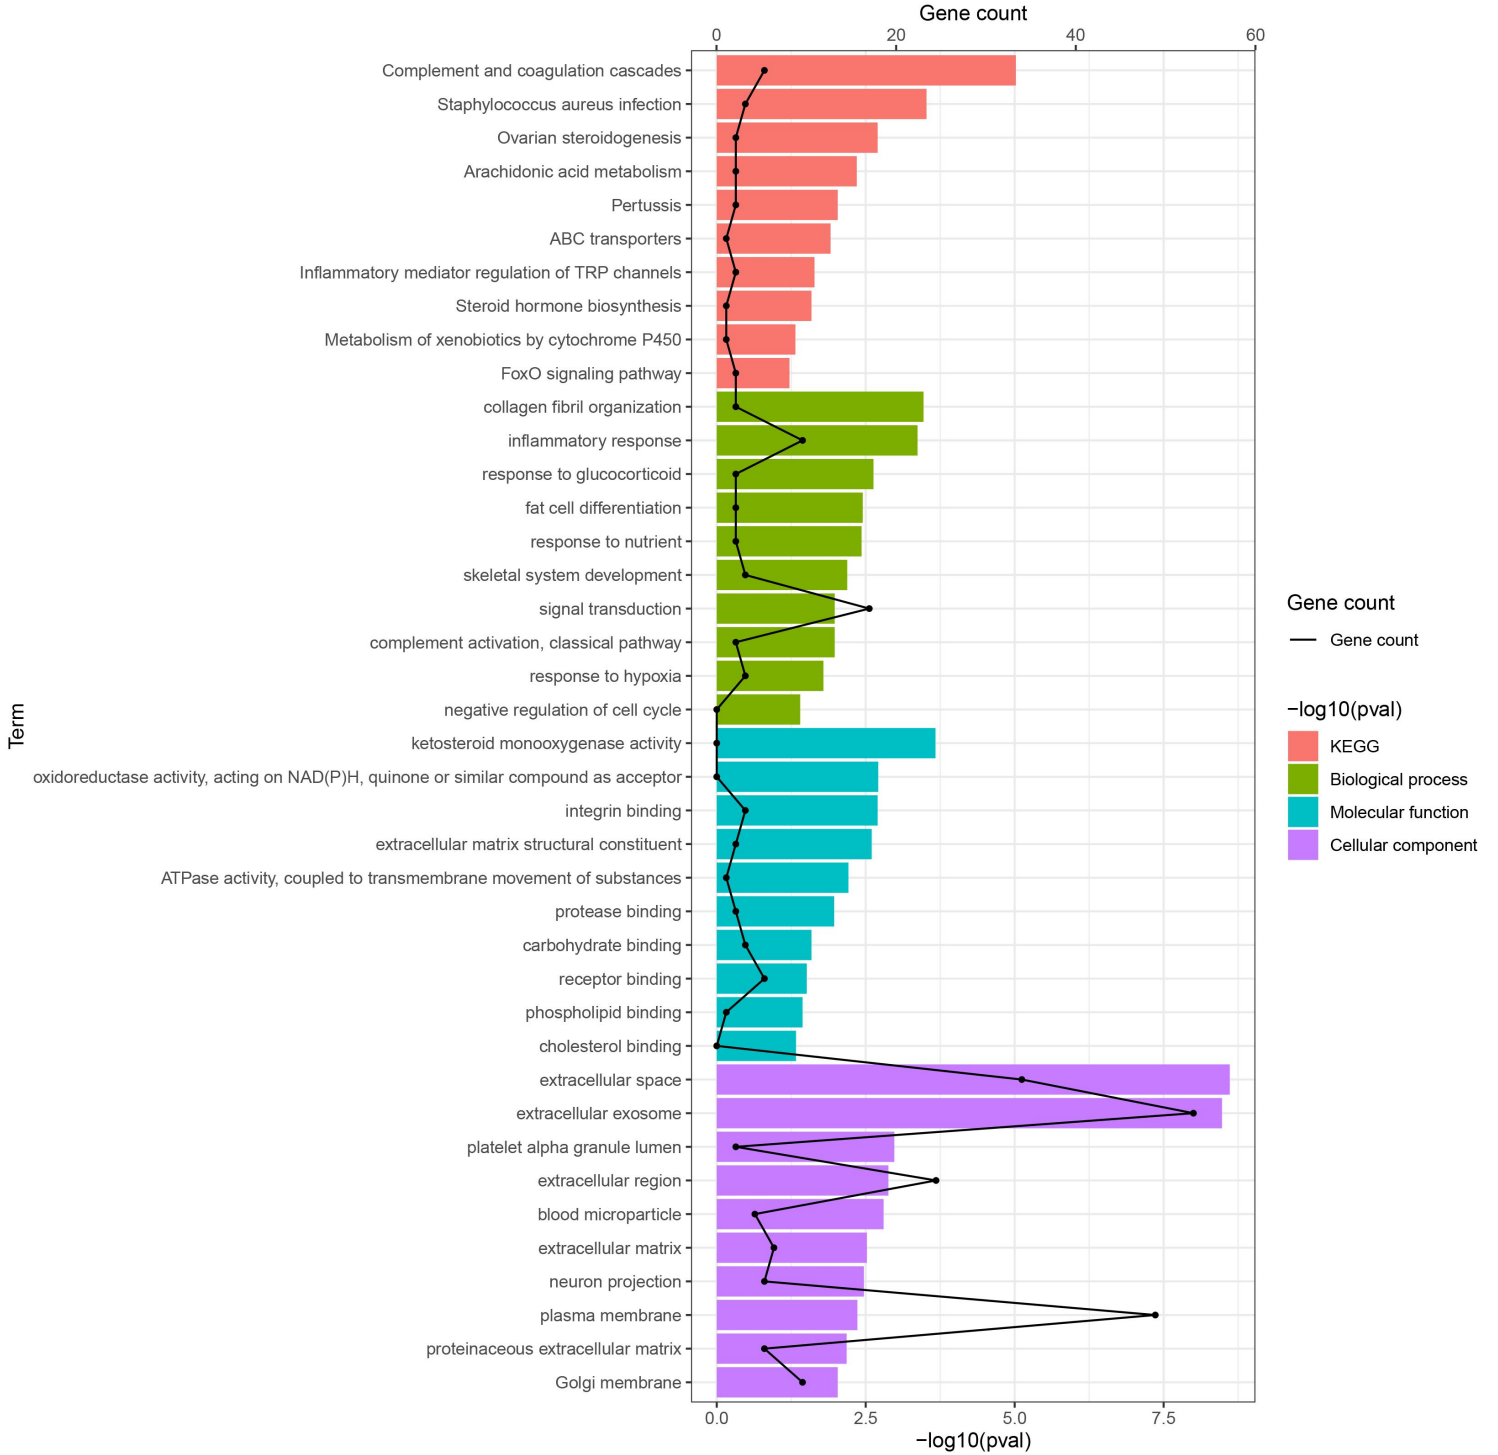

# Functional Cluster

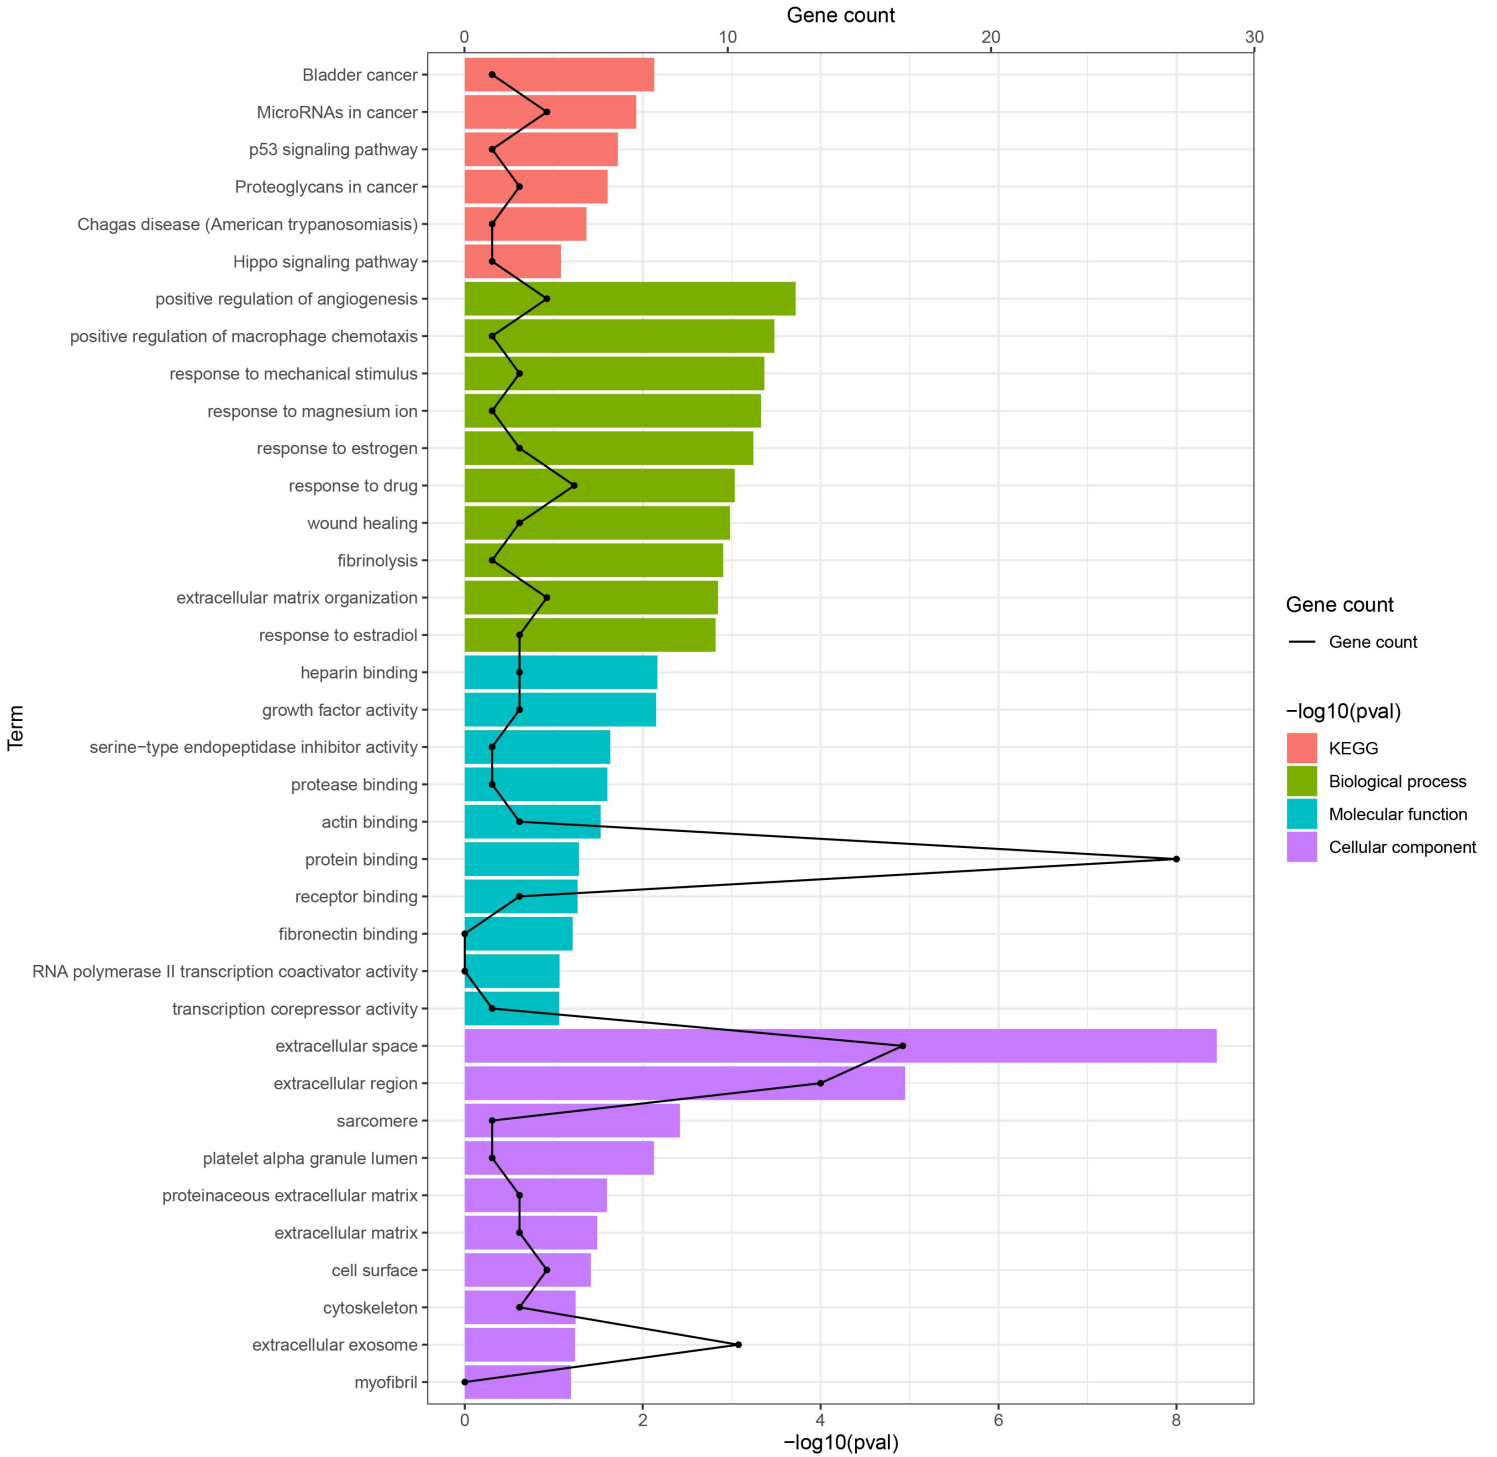

# Proliferative Cluster 1

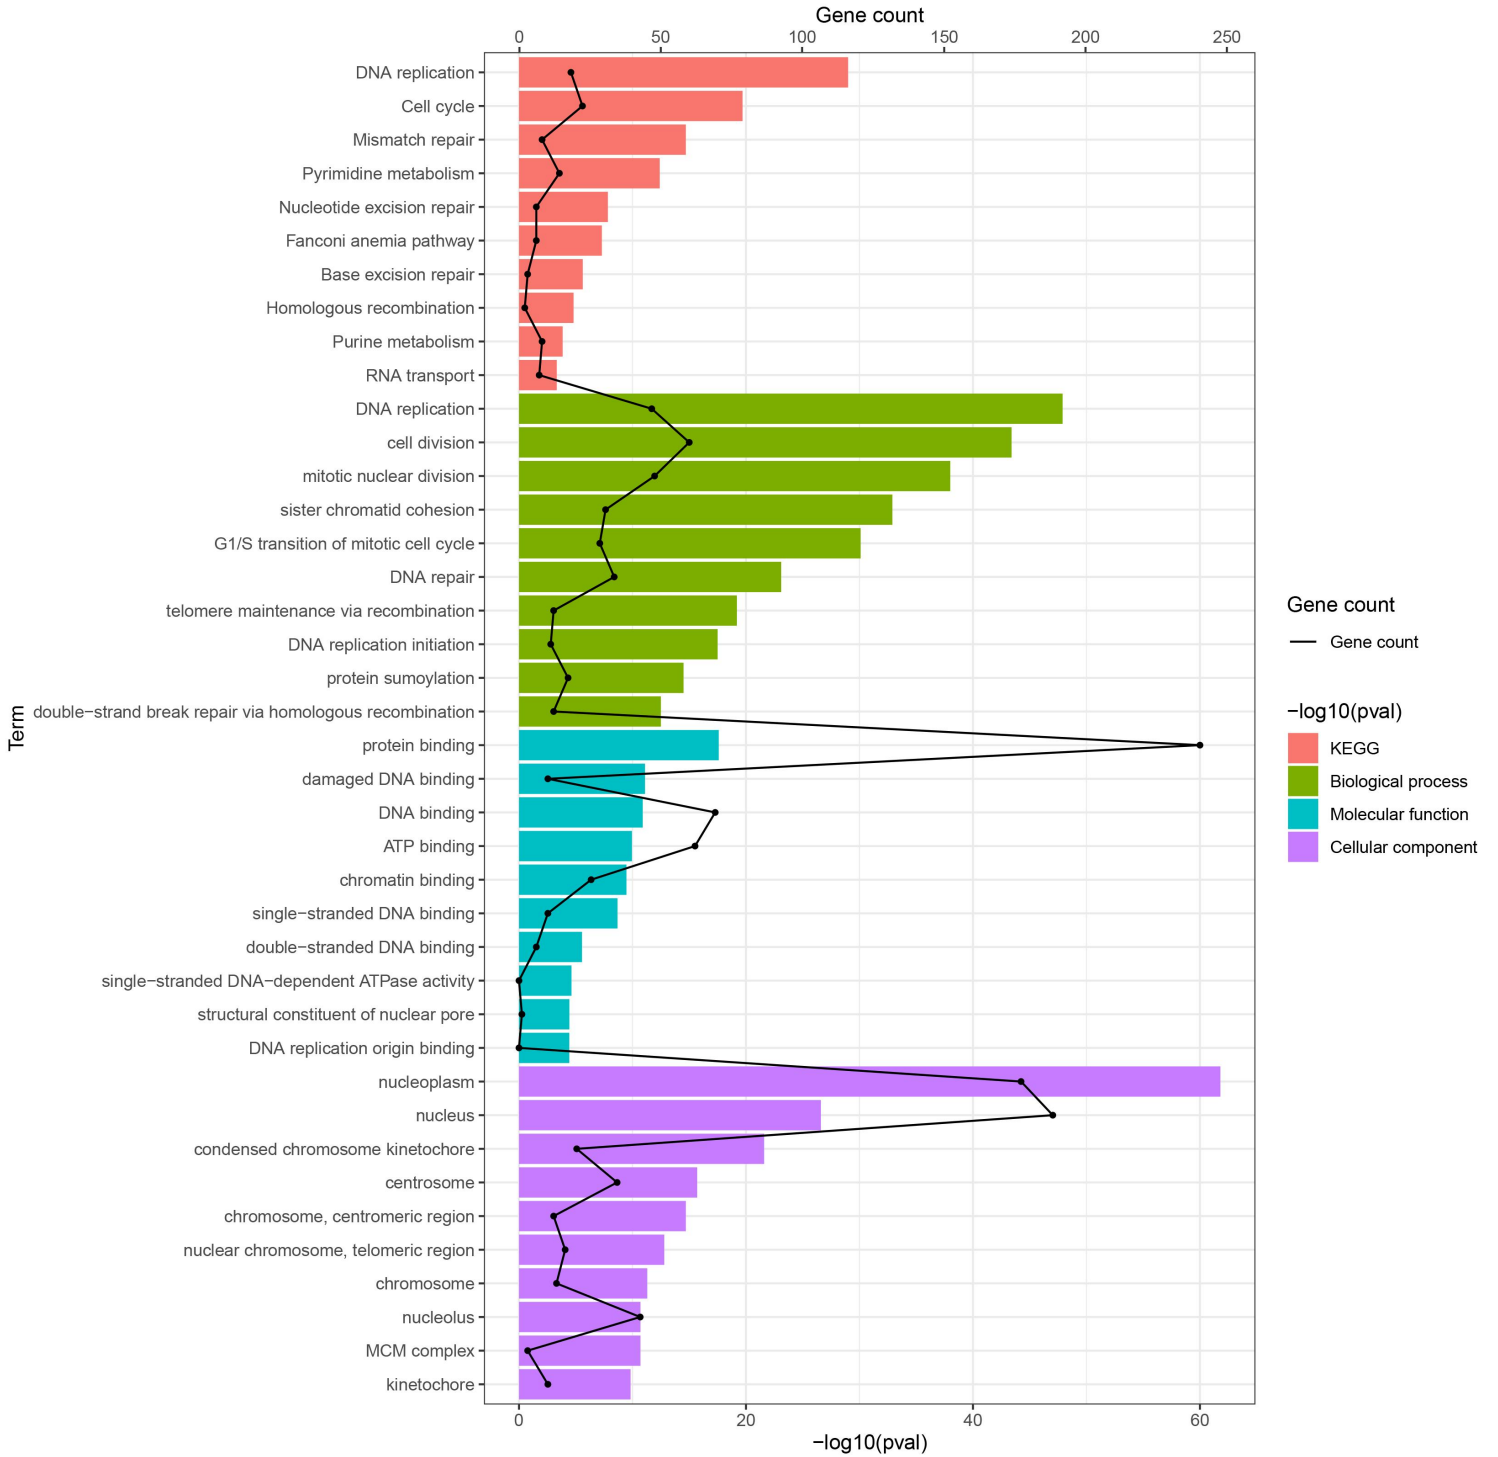

## Proliferative Cluster 2

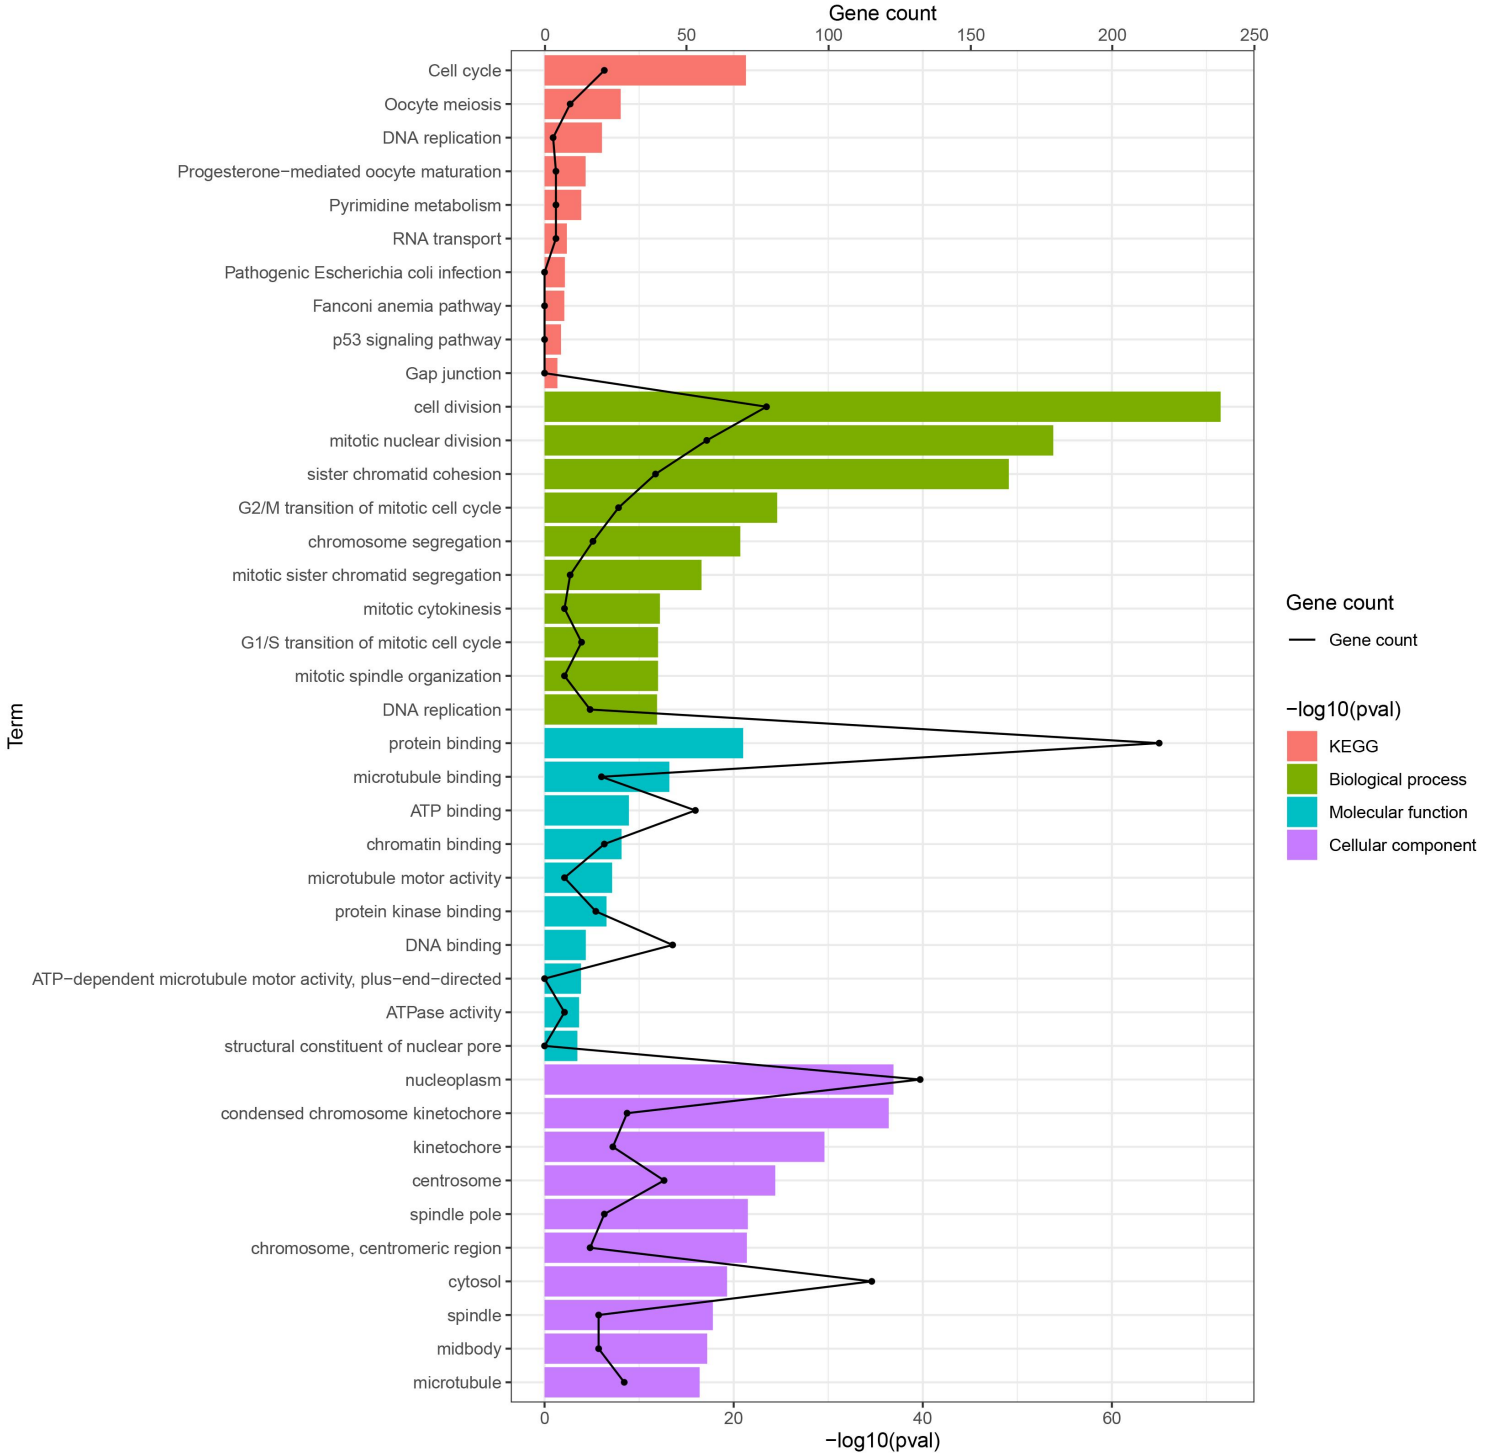

Supplement: 12276_2022_749_MOESM1_ESM.pdf [file 12276_2022_749_MOESM1_ESM.pdf]
